# Supplementary material for: Chitosan-Derived Porous Activated Carbon for the Removal of the Chemical Warfare Agent Simulant Dimethyl Methylphosphonate
Source: MDPI journal article supplement (doi:10.3390/nano9121703), 2019-11-28
Supplement: s1 [file s1]

## Supplementary Materials

# Chitosan-Derived Porous Activated Carbon for the Removal of the Chemical Warfare Agent Simulant Dimethyl Methylphosphonate

Hyejin Yu <sup>1,2</sup>, Ye Rim Son <sup>1</sup>, Hyeonji Yoo <sup>1</sup>, Hyun Gil Cha <sup>2,\*</sup>, Hangil Lee <sup>3,\*</sup>  
and Hyun Sung Kim <sup>1,\*</sup>

<sup>1</sup> Department of Chemistry, Pukyong National University, Busan 48513, Korea; yuhj93@krikt.re.kr (Hyejin Yu); syl75218@daum.net (Y.R.S.); hjyoo1996@gmail.com (Hyeonji Yoo)

<sup>2</sup> Center for Bio-based Chemistry, Korea Research Institute of Chemical Technology (KRICT), Ulsan 44429, Korea

<sup>3</sup> Department of Chemistry, Sookmyung Women's University, Seoul 04310, Korea

\* Correspondence: hgcha@krikt.re.kr (H.G.C.); easyscan@sookmyung.ac.kr (H.L.); kimhs75@pknu.ac.kr (H.S.K.); Tel.: +82-51-629-5596 (H.S.K.)

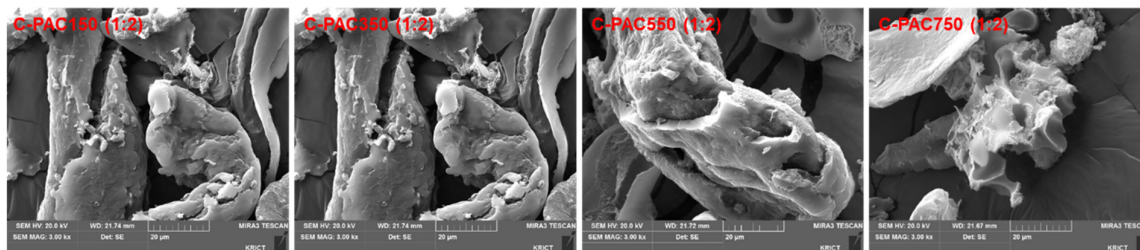

**Figure S1.** SEM images of activated carbons prepared by carbonization of chitosan with chitosan and activator (1:2) ratio at various temperature as indicated.

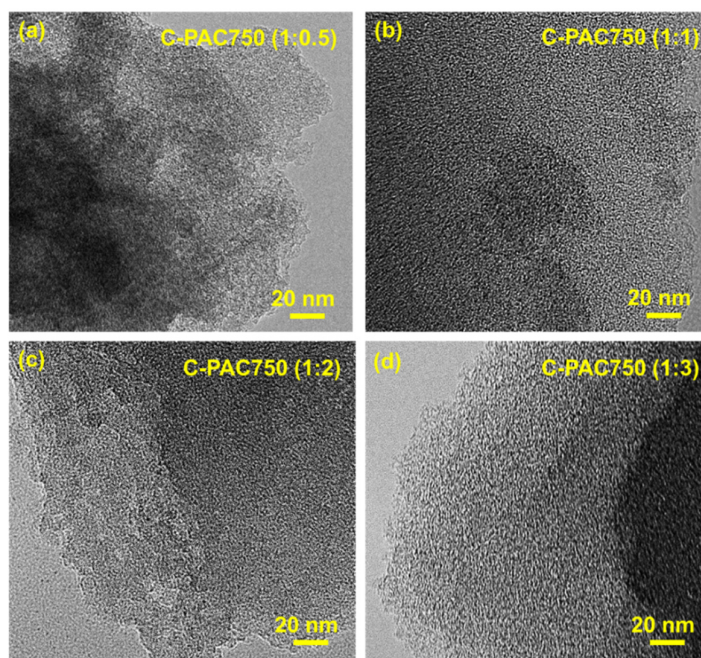

**Figure S2.** TEM images of the series of C-PAC750 materials as indicated.

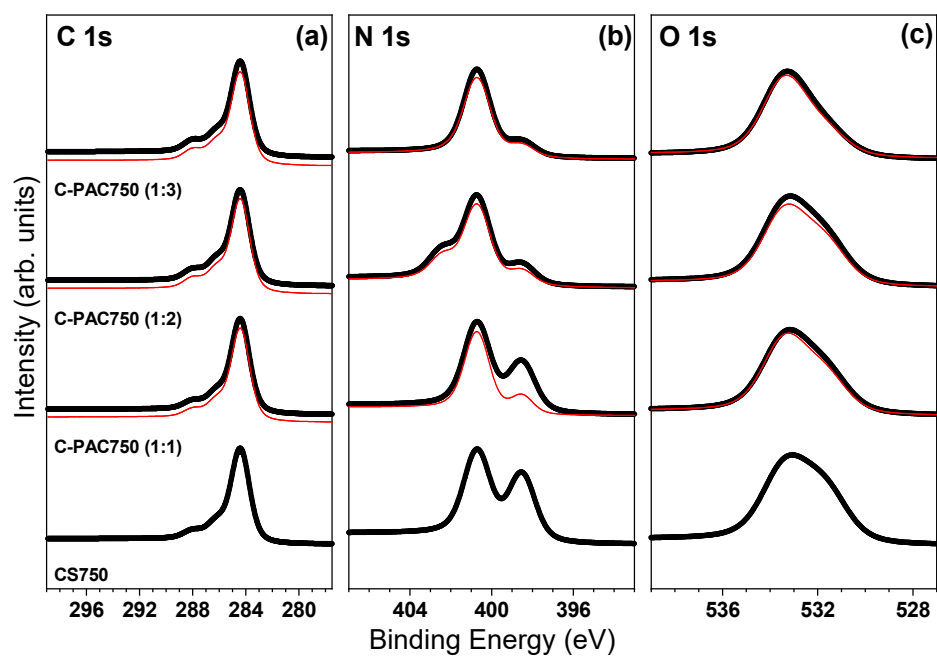

**Figure S3.** (a) C 1s, (b) N 1s, and (c) O 1s XPS spectra for the chitosan-derived carbon samples before and after adsorption of DMMP.
